# Supplementary material
Source: publisher figshare collection journal article supplement (https://brill.figshare.com/articles/dataset/_/14827767)
Supplement: Supplementary file 1 [file 1]

## **Phylogenetic analysis and trait evolution of ant cocoons**

**Jordan A. Greer<sup>a,\*</sup> and Corrie S. Moreau<sup>b</sup>**

<sup>a</sup>University of Chicago, Biological Sciences Division, Committee on Evolutionary Biology, 5801 S

Ellis Ave, Chicago, IL 60637, USA

<sup>b</sup>Cornell University, Departments of Entomology and Ecology & Evolutionary Biology, Ithaca, NY

14850, USA

\*Correspondencing author, e-mail: [jag1@uchicago.edu](mailto:jag1@uchicago.edu)

**Supplementary material**
