# Supplementary material
Source: publisher figshare collection journal article supplement (https://brill.figshare.com/articles/dataset/_/14827767)
Supplement: Supplementary file 2 [file 1]

## Polymorphism Phylogeny Binned (Variable)

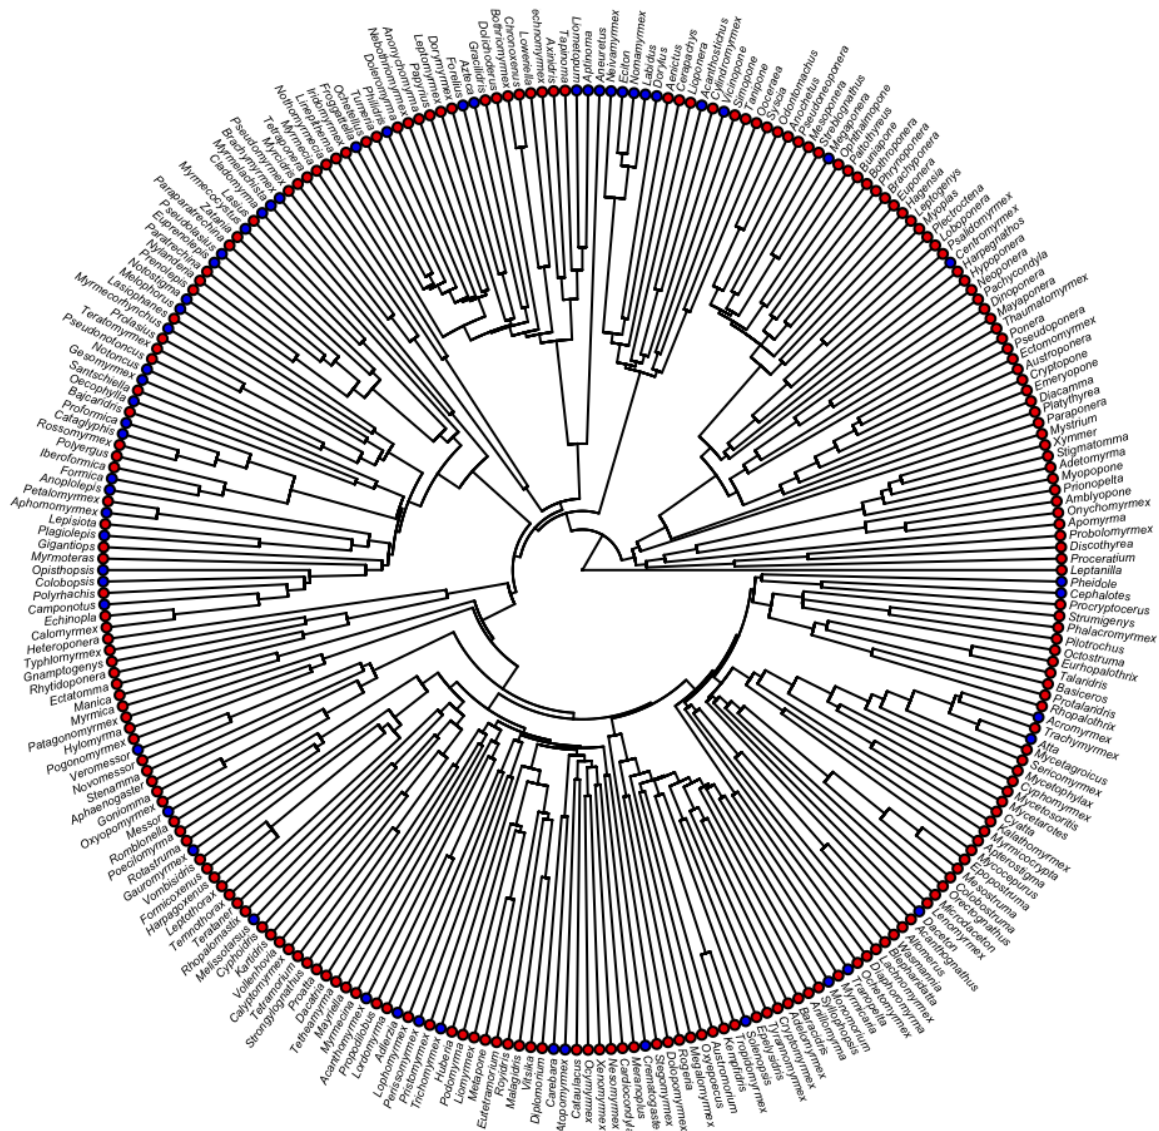

**Figure S3A.** Phylogeny of worker polymorphism. Any size variation in workers is binned as 1 (blue) and no size variation is binned as 0 (red). This tree represents the framework used for variable worker polymorphism in correlation analyses against cocoon presence/absence.

## Polymorphism Phylogeny Binned (Strict)

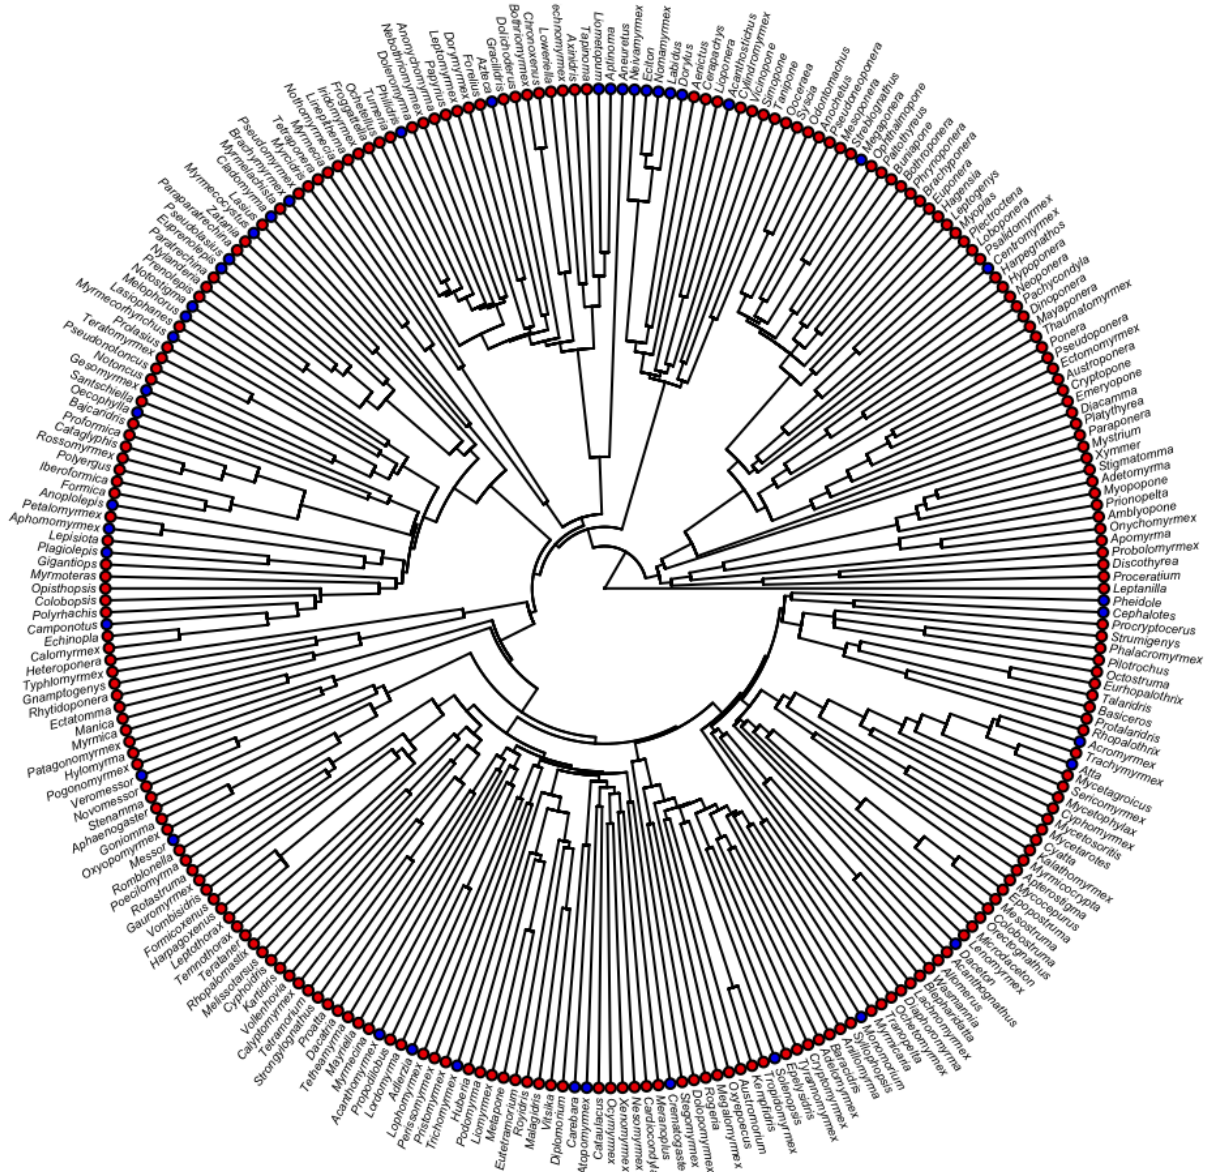

**Figure S3B.** Phylogeny of worker polymorphism. Genera with extreme worker dimorphism are binned as 1 (blue) and some/no size variation binned as 0 (red). This tree represents the framework used for strict worker polymorphism in correlation analyses against cocoon presence/absence.
