# Supplementary material
Source: publisher figshare collection journal article supplement (https://brill.figshare.com/articles/dataset/_/14827767)
Supplement: Supplementary file 3 [file 1]

**Figure S1. Metapleural Gland Ecological Correlation**

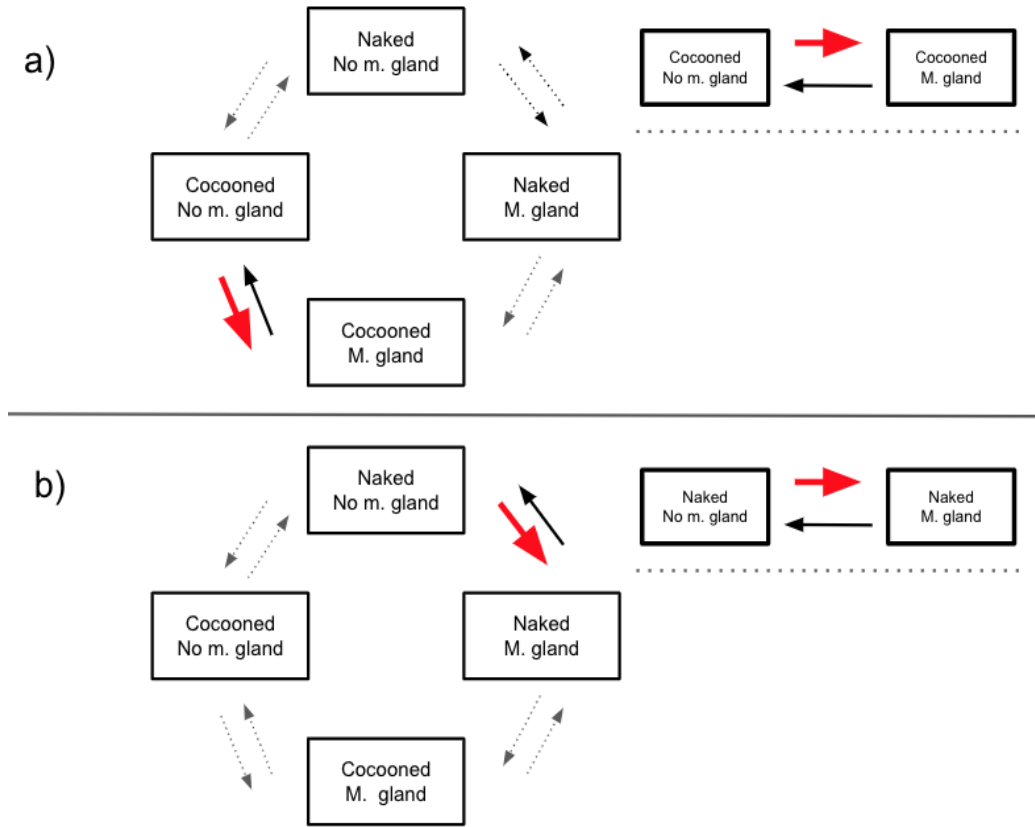

Depiction of the two two favored models of rate correlations between cocoon presence/absence and metapleural gland presence that fell within our criteria of biological relevance. Solid arrows depict rate changes being compared, and red arrows show rate that is favored. Insets are shown to highlight relevant relationships. Result suggests that the presence of a metapleural gland is not associated with cocoon status
