# Supplementary material
Source: publisher figshare collection journal article supplement (https://brill.figshare.com/articles/dataset/_/14827767)
Supplement: Supplementary file 4 [file 1]

# Metapleural Gland Phylogeny 0, 1, 0&1

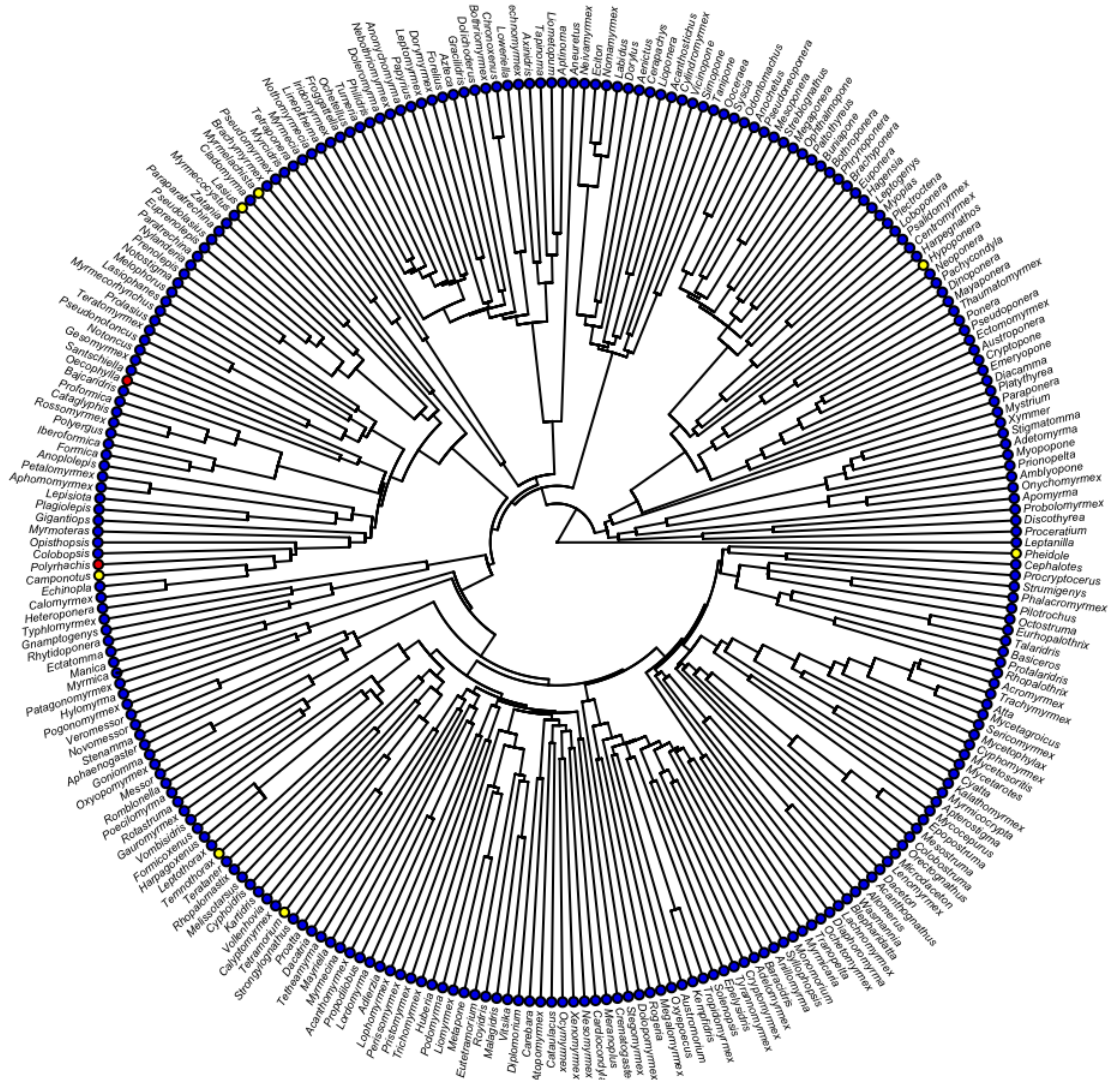

**Figure S2A.** Phylogeny based on metapleural gland absence (blue, 0), presence (red, 1) and polymorphism (0&1) across ant genera measured in this study.

# Metapleural Gland Phylogeny Binned

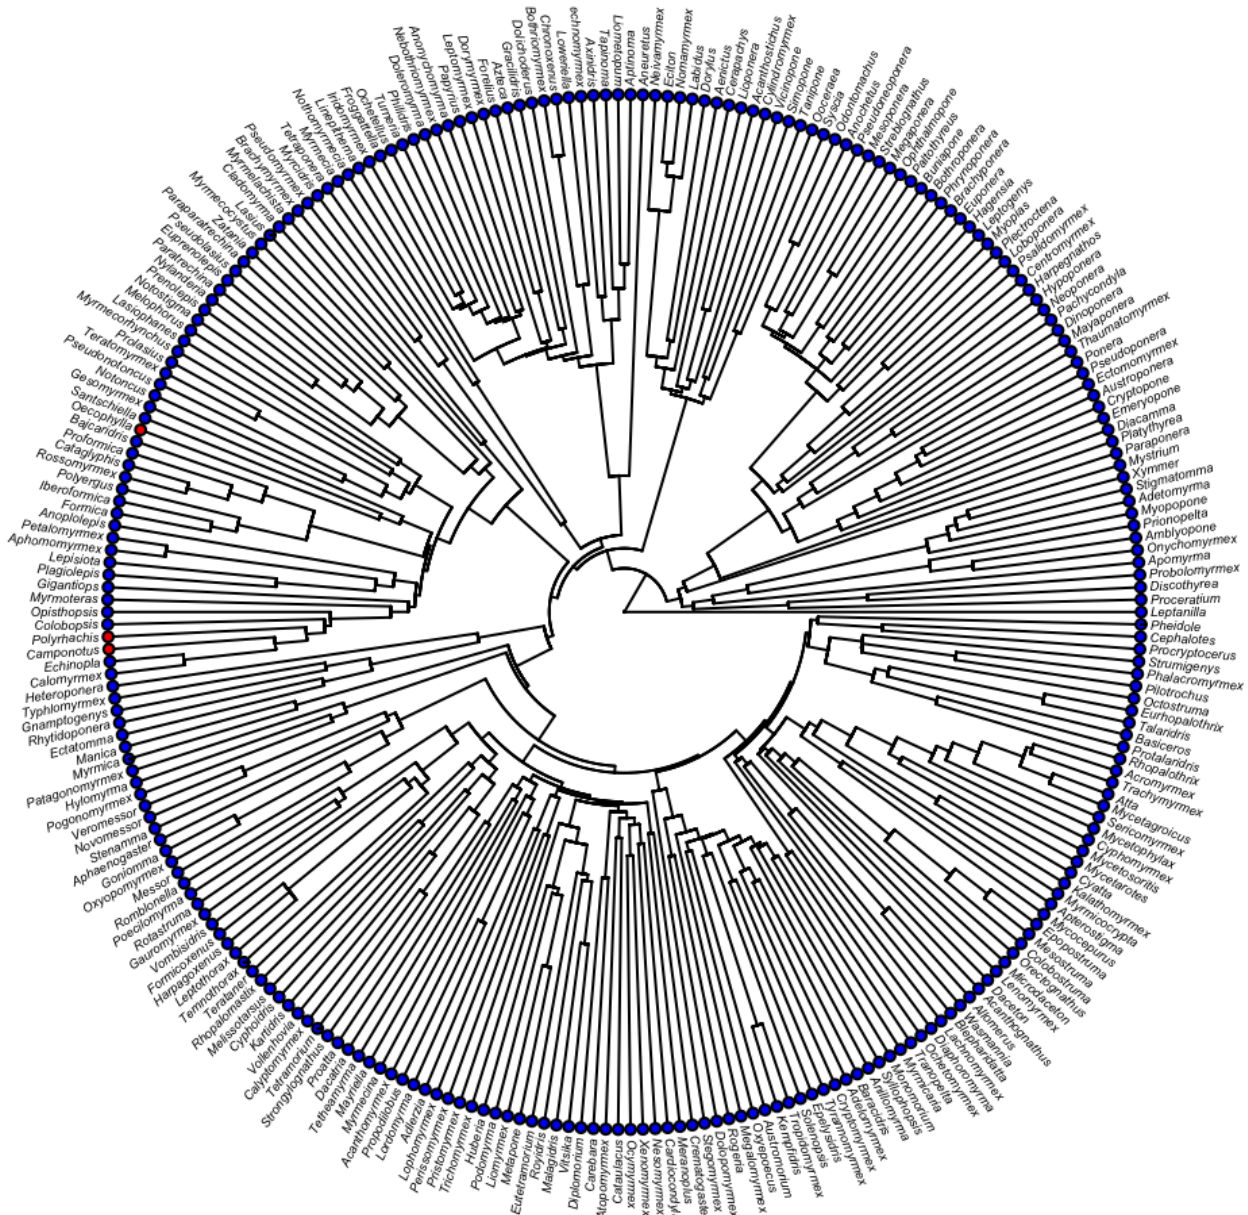

**Figure S2B.** Phylogeny of metapleural gland presence (red) and absence (blue) across ant genera after character state binning. This tree represents the framework used in correlation analyses against cocoon presence/absence.
